# Supplementary material
Source: PubMed Central journal article supplement (PMC6538062)
Supplement: NIHMS1020290-supplement-suppl.pdf [file NIHMS1020290-supplement-suppl.pdf]

## SUPPORTING INFORMATION

### **Polymeric Prodrugs Targeting Polyamine Metabolism Inhibit Zika Virus Replication**

Nanda Kishore Routhu<sup>1</sup>, Ying Xie<sup>2</sup>, Matthew Dunworth<sup>3</sup>, Robert A. Casero, Jr.<sup>3</sup>, David Oupicky<sup>2,\*</sup>, Siddappa N Byrareddy<sup>1,\*</sup>

<sup>1</sup> Department of Pharmacology and Experimental Neuroscience, University of Nebraska Medical Center, Omaha, NE, 68198, USA

<sup>2</sup> Center for Drug Delivery and Nanomedicine Department of Pharmaceutical Sciences University of Nebraska Medical Center, Omaha, NE, 68198, USA

<sup>3</sup> The Sidney Kimmel Comprehensive Cancer Center at Johns Hopkins University, Baltimore, MD 21287

---

\*Corresponding Authors:

Address for correspondence:

Siddappa Byrareddy, Ph.D.  
Department of Pharmacology and Experimental Neuroscience  
University of Nebraska Medical Center  
985800 Nebraska Medical Center  
Omaha, NE 68198-5800 USA  
Tel: (402) 559-5416  
Email: [sid.byrareddy@unmc.edu](mailto:sid.byrareddy@unmc.edu);

David Oupicky, Ph.D.  
Center for Drug Delivery and Nanomedicine  
Department of Pharmaceutical Sciences  
University of Nebraska Medical Center  
985830 Nebraska Medical Center  
Omaha, NE, 68198, USA  
Tel: (402) 559-9363  
[david.oupicky@unmc.edu](mailto:david.oupicky@unmc.edu)

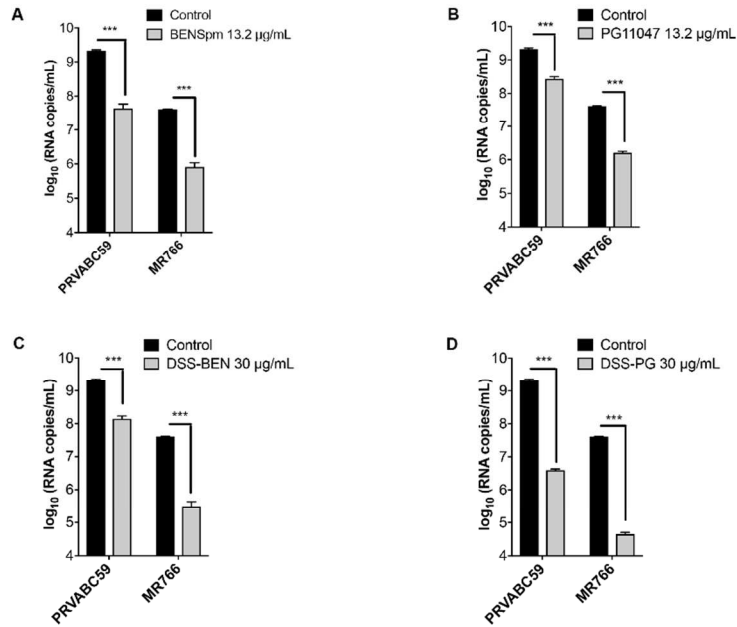

**Figure S1.** Antiviral effects of polyamine drugs treatment on Zika viral RNA loads in SNB-19 cells. Human glioblastoma (SNB-19) cells were treated with (A) BENSpm (13.2 µg/mL), (B) PG11047 (13.2 µg/mL), (C) DSS-BEN (30 µg/mL), or (D) DSS-PG (30 µg/mL) compounds for 16 h and infected with ZIKV at 0.2 MOI for 48 h. Viral RNA were extracted from the culture supernatants and quantified using qRT-PCR. One-way ANOVA is used to calculate the statistical significance and \*\*\* indicate  $p = 0.001$  ( $p < 0.05$ ).

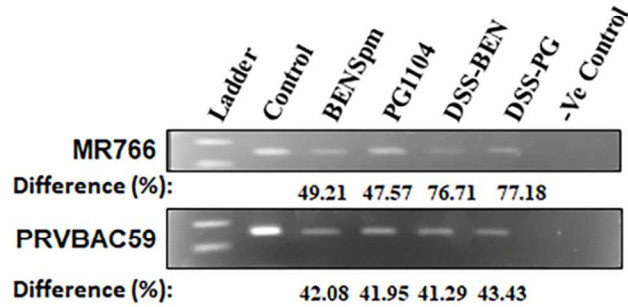

**Figure S2.** Polyamine prodrugs targets synthesis of negative-sense RNA strand during Zika virus replication. Vero cells were either treated with the BENSpm (13.2 $\mu$ g/ml) or PG11047 (13.2 $\mu$ g/ml) or with the DSS-BEN (30 $\mu$ g/ml) or with the DSS-PG (30 $\mu$ g/ml) or untreated for 16 h. These cells were further infected with ZIKV either African strain (MR766) or with the Asian strain (PRVABC59) at a MOI of 1 for 16 h. The total RNA was extracted from the polyamine drugs treated-infected and untreated-infected cells and subjected to semi-quantitative RT-PCR assay for the quantification of negative-sense ZIKV RNA. The band intensities were quantified using ImageJ software and presented as in the differences (%) for negative-sense RNA compared to untreated-infected controls.
